# Supplementary material
Source: Research Square preprint supplement (doi:10.21203/rs.3.rs-9526340/v1)
Supplement: Supplementary file 1 [file 3941ab875b588a958884c18e.docx]

- Nine intra-annual inflow patterns with distinct peak timing and shape are identified.
- Inflow patterns alter annual energy output by up to 6.6% under identical conditions.
- Effect of inflow patterns on energy output is mediated by reservoir storage capacity.
