# Supplementary material
Source: Research Square preprint supplement (doi:10.21203/rs.3.rs-9526340/v1)
Supplement: Supplementary file 2 [file bd319243d895db56c69ba123.docx]

**Appendix A. Supplementary data**

**Table A1** Intra-annual inflow distribution ratio of LHP under different intra-annual inflow patterns

| Intra-annual inflow Pattern | Intra-annual inflow distribution ratio (%) | | | | | | | | | | | |
| --- | --- | --- | --- | --- | --- | --- | --- | --- | --- | --- | --- | --- |
| June | July | August | September | October | November | December | January | February | March | April | May |
| Ⅰ | 15.8 | 19.3 | 10.6 | 11.4 | 9.9 | 5.8 | 3.2 | 2.5 | 2.6 | 3.5 | 6.2 | 9.2 |
| Ⅱ | 16.5 | 18.7 | 17.8 | 12.6 | 9.6 | 5.6 | 2.9 | 2.2 | 2.2 | 2.9 | 3.8 | 5.3 |
| Ⅲ | 9.0 | 15.4 | 11.2 | 24.4 | 13.3 | 5.6 | 2.6 | 2.1 | 2.1 | 2.6 | 4.1 | 7.7 |
| Ⅳ | 12.8 | 13.1 | 12.5 | 14.9 | 13.8 | 7.1 | 3.6 | 2.6 | 2.7 | 3.6 | 5.2 | 8.1 |
| Ⅴ | 13.8 | 25.3 | 16.2 | 9.8 | 9.1 | 5.2 | 2.7 | 2.2 | 2.2 | 3.0 | 4.4 | 6.2 |
| Ⅵ | 10.2 | 14.4 | 18.3 | 14.6 | 10.8 | 6.2 | 3.1 | 2.4 | 2.5 | 3.4 | 5.9 | 8.2 |
| Ⅶ | 10.2 | 19.7 | 13.9 | 14.2 | 14.1 | 6.4 | 2.9 | 2.3 | 2.3 | 2.9 | 4.5 | 6.5 |
| Ⅷ | 7.5 | 11.5 | 18.2 | 22.1 | 13.5 | 6.1 | 3.0 | 2.2 | 2.2 | 2.9 | 4.3 | 6.6 |
| Ⅸ | 10.7 | 9.6 | 7.7 | 14.6 | 19.7 | 8.4 | 3.7 | 2.6 | 2.5 | 3.6 | 5.7 | 11.2 |

**Table A2** Characterization frequency of annual runoff levels of LHP and their corresponding annual runoff volumes

| Annual inflow level | Higher level | High level | Normal level | Low level | Lower level |
| --- | --- | --- | --- | --- | --- |
| Frequency (%) | 10 | 30 | 50 | 70 | 90 |
| Inflow volume (billion m3) | 28.39 | 22.33 | 19.10 | 16.55 | 13.96 |

**Table A3** Allowable maximum discharges of LHP during different ice flood months

| Ice flood month | November | December | January | February | March |
| --- | --- | --- | --- | --- | --- |
| Allowable maximum discharge (m3/s) | 460 | 490 | 525 | 535 | 630 |

**Table A4** Monthly abandoned water volumes of LHP in some specific scheduling scenarios corresponding to the higher annual inflow level

| Initial water level (m) | Annual inflow pattern | Monthly abandoned water volume (billion m3) | | | | | | | | | | | |
| --- | --- | --- | --- | --- | --- | --- | --- | --- | --- | --- | --- | --- | --- |
| June | July | August | September | October | November | December | January | February | March | April | May |
| 2560 | Ⅲ | 0 | 0 | 0 | 0 | 0 | 0 | 0 | 0 | 0 | 0 | 0.496 | 0 |
| Ⅷ | 0 | 0 | 0 | 0 | 0 | 0 | 0 | 0 | 0 | 0 | 1.119 | 0 |
| 2570 | Ⅲ | 0 | 0 | 0 | 0 | 0 | 0 | 0 | 0 | 0 | 0 | 0.308 | 0 |
| Ⅷ | 0 | 0 | 0 | 0 | 0 | 0 | 0 | 0 | 0 | 0 | 0.882 | 0 |
| 2580 | Ⅱ | 1.561 | 0.047 | 0 | 0 | 0 | 0 | 0 | 0 | 0 | 0 | 0 | 0 |
| Ⅲ | 0 | 0.310 | 0 | 0 | 0 | 0 | 0 | 0 | 0 | 0 | 0.123 | 0 |
| Ⅴ | 0.778 | 0.847 | 0 | 0 | 0 | 0 | 0 | 0 | 0 | 0 | 0 | 0 |
| Ⅵ | 0 | 0 | 0 | 0 | 0 | 0 | 0 | 0 | 0 | 0 | 0.077 | 0 |
| Ⅶ | 0 | 0 | 0 | 0 | 0 | 0 | 0 | 0 | 0 | 0 | 1.210 | 0 |
| Ⅷ | 0 | 0.119 | 0.414 | 0 | 0 | 0 | 0 | 0 | 0 | 0 | 0.369 | 0 |
